# Supplementary material for: The Mitotic Arrest Deficient Protein MAD2B Interacts with the Clathrin Light Chain A during Mitosis
Source: PubMed Central journal article supplement (PMC2994903; doi:10.1371/journal.pone.0015128), 2010-11-30
Supplement: pone.0015128.s001.pdf [file pone.0015128.s001.pdf]

unsynchronized

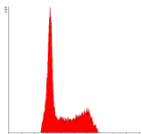

|       |     |
|-------|-----|
| G0/G1 | 59% |
| S     | 20% |
| G2/M  | 21% |

t = 0

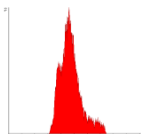

|       |     |
|-------|-----|
| G0/G1 | 13% |
| S     | 72% |
| G2/M  | 15% |

t = 3

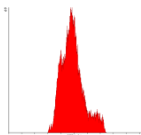

|       |     |
|-------|-----|
| G0/G1 | 10% |
| S     | 69% |
| G2/M  | 21% |

t = 6

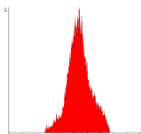

|       |     |
|-------|-----|
| G0/G1 | 3%  |
| S     | 48% |
| G2/M  | 49% |

t = 9

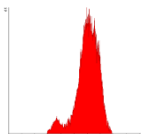

|       |     |
|-------|-----|
| G0/G1 | 3%  |
| S     | 12% |
| G2/M  | 85% |

t = 12

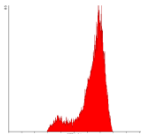

|       |     |
|-------|-----|
| G0/G1 | 7%  |
| S     | 12% |
| G2/M  | 81% |

t = 15

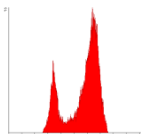

|       |     |
|-------|-----|
| G0/G1 | 19% |
| S     | 12% |
| G2/M  | 69% |
