# Supplementary material for: The Mitotic Arrest Deficient Protein MAD2B Interacts with the Clathrin Light Chain A during Mitosis
Source: PubMed Central journal article supplement (PMC2994903; doi:10.1371/journal.pone.0015128), 2010-11-30
Supplement: pone.0015128.s003.pdf [file pone.0015128.s003.pdf]

DAPI

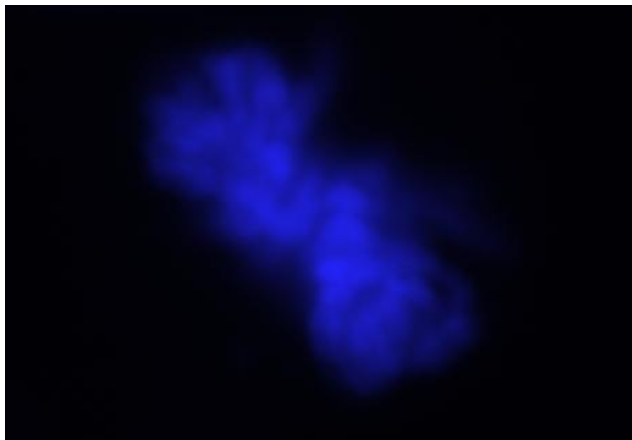

Merge

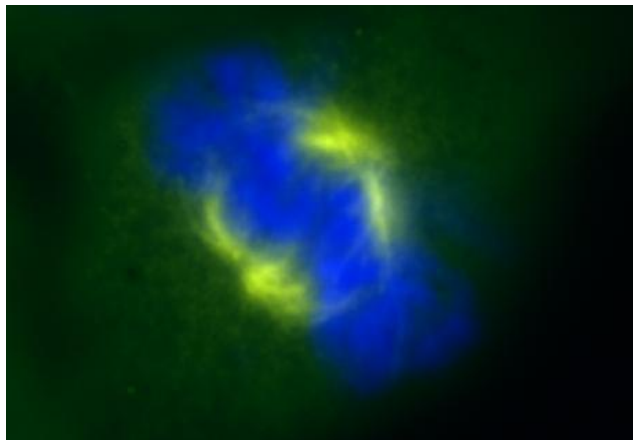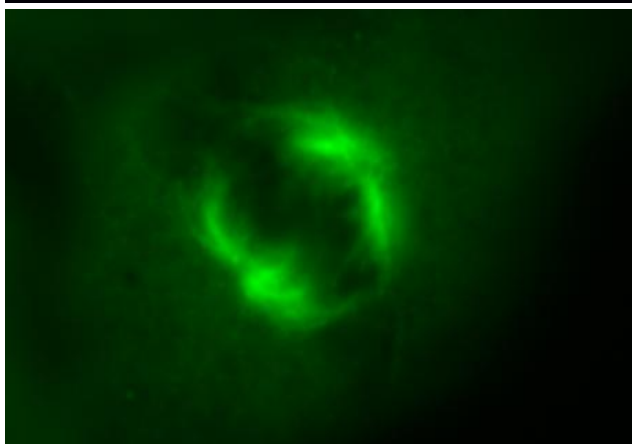

LCa

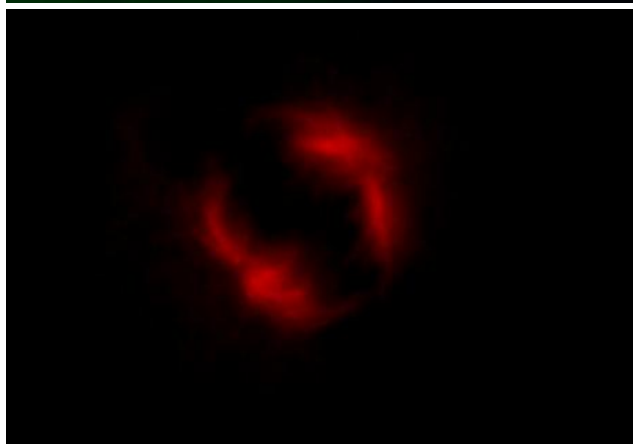

$\alpha$ -tubulin
